# Supplementary material for: Ixocarpalactone A from dietary tomatillo inhibits pancreatic cancer growth by targeting PHGDH
Source: Royal Society of Chemistry journal article supplement (doi:10.1039/c9fo00394k), 2019-01-01
Supplement: c9fo00394k1.xlsx [file c9fo00394k1.xlsx]

## Sheet: Sheet1
		Human PHGDH structure predicted by FFAS server
#	Score	Template	Links and tools	%id	First	MAFANLRKVLISDSLDPCCRKILQDGGLQVVEKQNLSKEELIAELQDCEGLIVRSATKVTADVINAAEKLQVVGRAGTGVDNVDLEAATRKGILVMNTPNGNSLSAAELTCGMIMCLARQIPQATASMKDGKWERKKFMGTELNGKTLGILGLGRIGREVATRMQSFGMKTIGYDPIISPEVSASFGVQQLPLEEIWPLCDFITVHTPLLPSTTGLLNDNTFAQCKKGVRVVNCARGGIVDEGALLRALQSGQCAGAALDVFTEEPPRDRALVDHENVISCPHLGASTKEAQSRCGEEIAVQFVDMVKGKSLTGVVNAQALTSAFSPHTKPWIGLAEALGTLMRAWAGSPKGTIQVITQGTSLKNAGNCLSPAVIVGLLKEASKQADVNLVNAKLLVKE…	Last
1	-117	1ygy_A mol:protein length:529 D-3-phosphoglycerate dehydrogenase	ali model follow..	32	1	..MVSLPVVLIADKLAPSTVAALGD-QVEVRWVDGPDRDKLLAAVPEADALLVRSATTVDAEVLAAAPKLKIVARAGVGLDNVDVDAATARGVLVVNAPTSNIHSAAEHALALLLAASRQIPAADASLREHTWKRSSFSGTEIFGKTVGVVGLGRIGQLVAQRIAAFGAYVVAYDPYVSPARAAQLGIELLSLDDLLARADFISVHLPKTPETAGLIDKEALAKTKPGVIIVNAARGGLVDEAALADAITGGHVRAAGLDVFATEPCTDSPLFELAQVVVTPHLGASTAEAQDRAGTDVAESVRLALAGEFVPDAVNVGGG--VVNEEVAPWLDLVRKLGVLAGVLSDELPVSLSVQVRGELAAEEVEVLRLSALRGLFSAVIED-AVTFVNAPALAAE…	528
2	-99.1	2g76_A mol:protein length:335 D-3-phosphoglycerate dehydrogenase	ali model follow..	99	16	.SMANLRKVLISDSLDPCCRKILQDGGLQVVEKQNLSKEELIAELQDCEGLIVRSATKVTADVINAAEKLQVVGRAGTGVDNVDLEAATRKGILVMNTPNGNSLSAAELTCGMIMCLARQIPQATASMKDGKWERKKFMGTELNGKTLGILGLGRIGREVATRMQSFGMKTIGYDPIISPEVSASFGVQQLPLEEIWPLCDFITVHTPLLPSTTGLLNDNTFAQCKKGVRVVNCARGGIVDEGALLRALQSGQCAGAALDVFTEEPPRDRALVDHENVISCPHLGASTKEAQSRCGEEIAVQFVDMVKGKSLTGV....................................................................................…	329
3	-95.8	1wwk_A mol:protein length:307 phosphoglycerate dehydrogenase	ali model follow..	42	2	....KRMKVLVAAPLHEKAIQVLKDAGLEVIYEEYPDEDRLVELVKDVEAIIVRSKPKVTRRVIESAPKLKVIARAGVGLDNIDVEAAKEKGIEVVNAPAASSRSVAELAVGLMFSVARKIAFADRKMREGVWAKKEAMGIELEGKTIGIIGFGRIGYQVAKIANALGMNILLYDPYPNEERAKEVNGKFVDLETLLKESDVVTIHVPLVESTYHLINEERLKLMKKTAILINTSRGPVVDTNALVKALKEGWIAGAGLDVFEEEPPKDHPLTKFDNVVLTPHIGASTVEAQERAGVEVAEKVVKILKG..........................................................................................…	307
4	-94	2ekl_A mol:protein length:313 D-3-phosphoglycerate dehydrogenase	ali model follow..	35	4	....YTVKALITDPIDEILIKTLREKGIQVDYMPEISKEELLNIIGNYDIIVVRSRTKVTKDVIEKGKKLKIIARAGIGLDNIDTEEAEKRNIKVVYAPGASTDSAVELTIGLMIAAARKMYTSMALAKSGIFKK--IEGLELAGKTIGIVGFGRIGTKVGIIANAMGMKVLAYDILDIREKAEKINAKAVSLEELLKNSDVISLHVTVSKDAKPIIDYPQFELMKDNVIIVNTSRAVAVNGKALLDYIKKGKVYAYATDVFWNEPPKEEELLKHERVIVTTHIGAQTKEAQKRVAEMTTQNLLNAMKELGM.......................................................................................…	312
5	-81	1mx3_A mol:protein length:347 C-terminal binding protein 1	ali model follow..	30	10	PRGSHMPLVALLDGRDCTEMPILKDVATVAFCDAQSTQEIHEKVLNEAVGALMYHTITLTREDLEKFKALRIIVRIGSGFDNIDIKSAGDLGIAVCNVPAASVEETADSTLCHILNLYRRATWLHQALREGTRVQSASGAARIRGETLGIIGLGRVGQAVALRAKAFGFNVLFYDPYLSDGVERALGLQRVTLQDLLFHSDCVTLHCGLNEHNHHLINDFTVKQMRQGAFLVNTARGGLVDEKALAQALKEGRIRGAALDVHESEPFSQGPLKDAPNLICTPHAAWYSEQASIEMREEAAREIRRAITGRIPDSLKNCVN...............................................................................…	340
6	-81	6cdf_A mol:protein length:373 C-terminal-binding protein 1	ali model follow..	30	10	PRGSHMPLVALLDGRDCTEMPILKDVATVAFCDAQSTQEIHEKVLNEAVGALMYHTITLTREDLEKFKALRIIVRIGSGFDNIDIKSAGDLGIAVCNVPAASVEETADSTLCHILNLYRRATWLHQALREGTRVQSASGAARIRGETLGIIGLGRVGQAVALRAKAFGFNVLFYDPYLSDGVERALGLQRVTLQDLLFHSDCVTLHCGLNEHNHHLINDFTVKQMRQGAFLVNTARGGLVDEKALAQALKEGRIRGAALDVHESEPFSQGPLKDAPNLICTPHAAWYSEQASIEMREEAAREIRRAITGRSLKNCVNKDHLTAAHWASMDPAVVHPELNGAA.........................................................…	366
7	-79.6	2ome_A mol:protein length:336 C-terminal-binding protein 2	ali model follow..	30	1	.SMHPRPLVALLDGRDTVEMPILKDLATVAFCDAQSTQEIHEKVLNEAVGAMMYHTITLTREDLEKFKALRVIVRIGSGYDNVDIKAAGELGIAVCNIPSAAVEETADSTICHILNLYRRNTWLYQALREGTRVQSASGAARIRGETLGLIGFGRTGQAVAVRAKAFGFSVIFYDPYLQDGIERSLGVQRVTLQDLLYQSDCVSLHCNLNEHNHHLINDFTIKQMRQGAFLVNAARGGLVDEKALAQALKEGRIRGAALDVHESEPFSQGPLKDAPNLICTPHTAWYSEQASLEMREAAATEIRRAITGRIPESLRNCVN...............................................................................…	330
8	-79.2	1hku_A mol:protein length:358 C-TERMINAL BINDING PROTEIN 3	ali model follow..	31	14	.PMHPRPLVALLDGRDTVEMPILKDVATVAFCDAQSTQEIHEKVLNEAVGALMYHTITLTREDLEKFKALRIIVRIGSGFDNIDIKSAGDLGIAVCNVPAASVEETADSTLCHILNLYRRTTWLHQALREGTRVQSASGAARIRGETLGIIGLGRVGQAVALRAKAFGFNVLFYDPYLSDGIERALGLQRVTLQDLLFHSDCVTLHCGLNEHNHHLINDFTVKQMRQGAFLVNTARGGLVDEKALAQALKEGRIRGAALDVHESEPFSQGPLKDAPNLICTPHAAWYSEQASIEMREEAAREIRRAITGRSLKNCVNKDHLTAAT..........................................................................…	351
9	-77.8	4lcj_A mol:protein length:349 C-terminal-binding protein 2	ali model follow..	30	16	.GSHPRPLVALLDGRDTVEMPILKDLATVAFCDAQSTQEIHEKVLNEAVGAMMYHTITLTREDLEKFKALRVIVRIGSGYDNVDIKAAGELGIAVCNIPSAAVEETADSTICHILNLYRRNTWLYQALREGTRVQSASGAARIRGETLGLIGFGRTGQAVAVRAKAFGFSVIFYDPYLQDGIERSLGVQRVTLQDLLYQSDCVSLHCNLNEHNHHLINDFTIKQMRQGAFLVNAARGGLVDEKALAQALKEGRIRGAALDVHESEPFSQGPLKDAPNLICTPHTAWYSEQASLEMREAAATEIRRAITGRIPESLRNCVN...............................................................................…	345
10	-77.6	4njm_A mol:protein length:309 D-3-phosphoglycerate dehydrogenase, putative	ali model follow..	31	6	.......VVITEKPFAENAVKGIREAGHEVMIEKYKKKEDVIERIKDADGVIVRS-DKIDEEIIKAGEKVKIIVRAGAGYDNIDIEACNQGKIVVMNTPGQNRNGVAELCIGMMIFGFR-------------KGFKEGKGRELKDKTLGICGCGYVGKRVKEIAEGIGMKIKVYDPFITTENQ------VKKIEELFEECQVISLHLPLTKETKGKIGYELIKKLPYGGMICNTARKEIIDEEGLIRIMREREDLIYITDVAPTSKVFNNEF--KGRFFATPKIGAETEESNINAGMAAASQICDFFTNGTVKFQVNKF................................................................................…	301
11	-75.2	3naq_A mol:protein length:357 Formate dehydrogenase	ali model follow..	29	26	......PNFLGCVENALGIRDWLESQGHQVTDDKEGPDCELEKHIPDLHVLISTHPAYVTAERIKKAKNLKLLLTAGIGSDHIDLQAAAAAGLTVAEVTGSNVVSVAEDELMRILILMRNFVPGYNQVVKGEWNVAAYRAYDLEGKTIGTVGAGRIGKLLLQRLKPFGCNLLYHDRLMAPELEKETGAKFVDLNEMLPKCDVIVINMPLTEKTRGMFNKELIGKLKKGVLIVNNARGAIMERQAVVDAVESGHIGGYSGDVWDPQPPKDHPWRYMPNQAMTPHTSGTTIDAQLRYAAGTKDMLERYFKGEDFPTE-NYIVKDGELAPQYR.....................................................................…	357
12	-74.1	3wr5_A mol:protein length:406 Formate dehydrogenase	ali model follow..	25	47	.AIDFTPGQLLGSVSGELGLRKYLEANFVVTSDKDGPDSVFEKELVDADVVISQPPAYLTPERIAKAKNLKLALTAGIGSDHVDLQSAIDRGITVAEVTYCNSISVAEHVVMMILGLVRNYIPSHDWARKGGWNIADCVSYDLEGMTVGSVAAGRIGLAVLRRLAPFDVKLHYTDRHLPEAVEKELGLVWHTREDMYPHCDVVTLNVPLHPETEHMINDETLKLFKRGAYIVNTARGKLADRDAIVRAIESGQLAGYAGDVWFPQPPKDHPWRTMKWEGMTPHISGTSLSAQARYAAGTREILECFFEGRPIRDEYLIVQGGALAGTGAHSYSKGNATGGSEEAAKFK...................................................…	403
13	-73.5	2d0i_A mol:protein length:333 dehydrogenase	ali model follow..	28	2	.....RPKVGVLLKMKREALEELKKY-ADVEIILYPSGEELKGVIGRFDGIIVSPTTKITREVLENAERLKVISCHSAGYDNIDLEEATKRGIYVTKVSGLLSEAVAEFTVGLIINLMRKIHYADKFIRRGEWESHAKRIESLYGKKVGILGMGAIGKAIARRLIPFGVKLYYWSRHRKVNVEKELKARYMDIDELLEKSDIVILALPLTRDTYHIINEERVKKLE-GKYLVNIGRGALVDEKAVTEAIKQGKLKGYATDVFEKEPREHELFKYEWETVLTPHYAGLALEAQEDVGFRAVENLLKVLRGEVPEDLVNKEVLEVRPIENVKML...................................................................…	333
14	-71.7	2fss_A mol:protein length:365 formate dehydrogenase	ali model follow..	25	21	LYGCTENKLGIANWLKDQGHELI------TTSDEEGGNSVLDQHIPDADIIITTHPAYITKERIDKAKKLKLVVVAGVGSDHIDLDYINQTGISVLEVTGSNVVSVAEHVVMTMLVLVRNFVPAHEQIINHDWEVAAIAAYDIEGKTIATIGAGRIGYRVLERLVPFNPKELLYYDYLPKDAEEKVGARRVNIEELVAQADIVTVNAPLHAGTKGLINKELLSKFKKGAWLVNTARGAICVAEDVAAALESGQLRGYGGDVWFPQPPKDHPWRDMRNKYMTPHYSGTTLDAQTRYAQGTKNILESFFTGKFDYRPQDIILLNGEYVT--KAYGKHDKK.............................................................…	365
15	-71.6	5dn9_A mol:protein length:364 FDH	ali model follow..	25	20	LYGCTENKLGIANWLKDQGHELI------TTSDKEGGNSVLDQHIPDADIIITTHPAYITKERIDKAKKLKLVVVAGVGSDHIDLDYINQTGISVLEVTGSNVVSVAEHVLMTMLVLVRNFVPAHEQIINHDWEVAAIAAYDIEGKTIATIGAGRIGYRVLERLVPFNPKELLYYDYLPKDAEEKVGARRVNIEELVAQADIVTINAPLHAGTKGLINKELLSKFKKGAWLVNTARGAICVAEDVAAALESGQLRGYGGDVWFPQPPKDHPWRDMRNKYMTPHYSGTTLDAQTRYAEGTKNILESFFTGKFDYRPQDIILLNGEYITKAYGKHD.................................................................…	362
16	-71.1	3gvx_A mol:protein length:290 Glycerate dehydrogenase related protein	ali model follow..	24	2	.......DVYVNFPADG---------HVREIAKTVLDGFDLHWYPDYYDAE-----AQVIKDRYVLGKRTKMIQAISAGVDHIDVNGIPENVVLCSNAG-AYSISVAEHAFALLLAHAKNILENNELMKAGIFRQ--SPTTLLYGKALGILGYGGIGRRVAHLAKAFGMRVIAYTRSSVDQ---NVDVISESPADLFRQSDFVLIAIPLTDKTRGMVNSRLLANARKNLTIVNVARADVVSKPDMIGFLKERSDVWYLSDVWWNEPEI--TETNLRNAILSPHVAGGMSGEIMDIAIQLAENVRNFFEGEG........................................................................................…	284
17	-68.7	4xyb_A mol:protein length:391 Formate dehydrogenase	ali model follow..	25	42	.HIDFVPGELLGCVSGELGLRSYLEDLGHTFIDKEGPNSVFEKELPDADIVISQPPAYLTAERIAKAKKLKLALTAGIGSDHVDLNAAIKAGITVAEETFSNGICVAEHAVMMILALVRNYLPSHKIAEEGGWNIADCVSYDLEGMHVGTVAAGRIGLAVLRRLKPFDVKLHYTARHRSPRAIEDLGLTYHTAEEMAEVCDVISIHAPLYPATEHLFNAKVLNKMRHGSYLVNTARAEICDRDDIVRALESGQLAGYAGDVWFPQPPANHPWRNMPHNGMTPHMSGSSLSGQARYAAGTREILECWFENRPIRDEYLIVSNGKLAGTGAKSYGVGEAPKGK..........................................................…	391
18	-68.4	2go1_A mol:protein length:401 NAD-dependent formate dehydrogenase	ali model follow..	25	42	.AIDFTPGQLLGSVSGELGLRKYLESTLVVTSDKDGPDSVFERELVDADVVISQPPAYLTPERIAKAKNLKLALTAGIGSDHVDLQSAIDRNVTVAEVTYCNSISVAEHVVMMILSLVRNYLPSHEWARKGGWNIADCVAYDLEAMHVGTVAAGRIGLAVLRRLAPFDVHLHYTDRHLPESVEKELNLTWHTREDMYPVCDVVTLNCPLHPETEHMINDETLKLFKRGAYIVNTARGKLCDRDAVARALESGRLAGYAGDVWFPQPPKDHPWRTMPYNGMTPHISGTTLTAQARYAAGTREILECFFEGRPIRDSKGNATGGSEEAAKFKKAV..................................................................…	401
19	-68.3	2gsd_A mol:protein length:402 NAD-dependent formate dehydrogenase	ali model follow..	26	42	.AIDFTPGALLGSVSGELGLRKYLESELVVTSSKDGPDSELEKHLHDAEVIISQPPAYLTAERIAKAPKLKLALTAGIGSDHVDLQAAIDNNITVAEVTYCNSNSVAEHVVMMVLGLVRNYIPSHDWARNGGWNIADCVSYDVEGMHVGTVAAGRIGLRVLRLLAPFDMHLHYTDRHLPEAVEKELNLTWHTREDMYGACDVVTLNCPLHPETEHMINDETLKLFKRGAYLVNTARGKLCDRDAIVRALESGRLAGYAGDVWFPQPPNDHPWRTMPHNGMTPHISGTSLSAQTRYAAGTREILECYFEGRPIRDEYLIVGAHSYSKGNATGGSEEAAKYEKLDA.......................................................…	402
20	-67	4s1v_D mol:protein length:332 D-3-phosphoglycerate dehydrogenase-related pr	ali model follow..	25	1	.....MMKIAILDDYQNVVRGLLQGHDVTVFNDSVSDETVLIERLKPFEALVIRERTPITENLLAHLPNLKLISQTGKVSNHIDVPLCERYGVTVLEGI-GSPVAPAELCWSLILAASRHLPSYIEQLHAGHWQQNGGLGLTLSGRTLGIWGLGKIGQRIAQFGHVFGMPILVWGSEASRQKALELGYQAADKAEFFAKADVLSLHLRLNDATRGIVTKQDLLAMKPDSLFVNTSRAELVESGALYSVMQANPMRQAAVDVYENEPPNNEPLLSLPNVLCAPHLGYVEKNSYEIYFQAAFENVVKFAHSAAK-ASLSDKALE.............................................................................…	326
21	-62.9	5aow_A mol:protein length:333 GLYOXYLATE HYDROXYPYRUVATE REDUCTASE	ali model follow..	32	2	.....KPKVLITRAIPENGIELLREH-FEVEVWEHIPREVLLEKVKDVDALVTMLSEKIDREVFDAAPRLRIVANYAVGYDNIDIEEATKRGIYVTNTPDVLTDATADLAWALLLAAARHVVKGDKFVRSGEWKRRMFLGYDVYGKTIGIVGFGRIGQAIAKRAKGFGMRILYTARSRKPEAEKELGAEFKPLEELLRESDFVVLAVPLTKETYHMINEERLRLMKPTAVLVNVARGKVVDTKALIRALKEGWIAAAGLDVFEEEPYYDEELFALDNVVLTPHIGSATFGAREGMAELVAKNLIAFKNGEVPPTLVNREVLKVR...........................................................................…	329
22	-62.7	5aov_A mol:protein length:336 GLYOXYLATE REDUCTASE	ali model follow..	31	2	.....KPKVFITRAIPENGINMLEEE-FEVEVWEEIPREKLLEKVKDVDALVTMLSERIDQEVFENAPRLRIVANYAVGYDNIDVEEATRRGIYVTNTPDVLTNATADHAFALLLATARHVVKGDKFVRSGEWKRKWFLGYELYGKTIGIVGFGRIGQAIARRAKGFNMRILYYSRTRKSQAEKELGAEYRPLEEVLKESDFVILAVPLTKETMYMINEERLKLMKPTAILVNIARGKVVDTKALIKALKEGWIAGAGLDVFEEEPYYNEELFSLDNVVLTPHIGSATFEAREAMAELVARNLIAFKRGEIPPTLVNKEVIKIR...........................................................................…	329
23	-62.5	2dbq_A mol:protein length:334 Glyoxylate reductase	ali model follow..	31	2	.....KPKVFITREIPEVGIKMLEDE-FEVEVWGDIPREILLKKVKEVDALVTMLSERIDKEVFENAPKLRIVANYAVGYDNIDIEEATKRGIYVTNTPDVLTDATADLAFALLLATARHVVKGDRFVRSGEWKKRWFLGYDVYGKTIGIIGLGRIGQAIAKRAKGFNMRILYYSRTRKEEVERELNAEFKPLEDLLRESDFVVLAVPLTRETYHLINEERLKLMKKTAILINIARGKVVDTNALVKALKEGWIAGAGLDVFEEEPYYNEELFKLDNVVLTPHIGSASFGAREGMAELVAKNLIAFKRGEIPPTLVNREVIKIR...........................................................................…	329
24	-60.8	2cuk_A mol:protein length:311 glycerate dehydrogenase/glyoxylate reductase	ali model follow..	33	2	.......RVLVTRTLPGKALDRLRERGLEVEVHRGLPKAELLKRVEGAVGLIPTVEDRIDAEVMDRAKGLKVIACYSVGVDHVDLEAARERGIRVTHTPGVLTEATADLTLALLLAVARRVVEGAAYARDGLWHPELLLGLDLQGLTLGLVGMGRIGQAVAKRALAFGMRVVYHA-----RTPKPLPYPFLSLEELLKEADVVSLHTPLTPETHRLLNRERLFAMKRGAILLNTARGALVDTEALVEALR-GHLFGAGLDVTDPEPPPGHPLYALPNAVITPHIGSAGRTTRERMAEVAVENLLAVLEGREPPNPV...................................................................................…	310
25	-60.7	4ebf_A mol:protein length:334 Thermostable phosphite dehydrogenase	ali model follow..	29	3	.....LPKLVITHRVHEEILQLLAPH-CELITNQTLTREEILRRCRDAQAMMAFMPDRVDADFLQACPELRVIGCALKGFDNFDVDACTARGVWLTFVPDLLTVPTAELAIGLAVGLGRHLRAADAFVRSGQFRQPRFYGTGLDNATVGFLGMGAIGLAMADRLQGWGATLQYHAA-LDTQTEQRLGLRQVACSELFASSDFILLALPLNADTLHLVNAELLALVRPGALLVNPCRGSVVDEAAVLAALERGQLGGYAADVFEMEQQIDPALLAHPNTLFTPHIGSAVRAVRLEIERCAAQNILQALAGERPINAVN..................................................................................…	327
26	-60.4	4g2n_A mol:protein length:345 D-isomer specific 2-hydroxyacid dehydrogenase	ali model follow..	24	17	MSTHPIQKAFLCRRFTPAIEAELRQR-FDLEVNLELTPSGIASRAHGAEVLFVTATEAITAEVIRKLPGLKTIATLSVGYDHIDMAAARSLGIKVLHTPDVLSDACAEIAMLLVLNACRRGYEADRMVRSGSWGPTQLLGMGLTGRRLGIFGMGRIGRAIATRARGFGLAIHYHNRTRLSHALEEGAIYHDTLDSLLGASDIFLIAAPGRPELKGFLDHDRIAKIPEGAVVINISRGDLINDDALIEALRSKHLFAAGLDVFANEPAIDPRYRSLDNIFLTPHIGSATHETRDAMGWLLIQGIEALNQSDVPDNLIS..................................................................................…	339
27	-59.5	1gdh_A mol:protein length:320 D-GLYCERATE DEHYDROGENASE	ali model follow..	26	1	.....KKKILITWPLPEAAMARARES-YDVIAHGDITIDEMIETAKSVDALLITLNEKCRKEVIDRIENIKCISTYSIGFDHIDLDACKARGIKVGNAPHGVTVATAEIAMLLLLGSARRAGEGEKMIRTRSWEPLELVGEKLDNKTLGIYGFGSIGQALAKRAQGFDMDIDYFD--ASSSDEASYQATFHSLDSLLSVSQFFSLNAPSTPETRYFFNKATIKSLPQGAIVVNTARGDLVDNELVVAALEAGRLAYAGFDVFAGEPNINEGYYDLPNTFLFPHIGSAATQAREDMAHQANDLIDALFGGADMSYAL...................................................................................…	319
28	-59.5	2gcg_A mol:protein length:330 Glyoxylate reductase/hydroxypyruvate reductas	ali model follow..	28	3	MRPVRLMKVFVTRRIPAEGRVALARAA---DSDEPIPAKELERGVAGAHGLLCLLSDHVDKRILDAAANLKVISTMSVGIDHLALDEIKKRGIRVGYTPDVLTDTTAELAVSLLLTTCRRLPEAIEEVKNGGWTSLWLCGYGLTQSTVGIIGLGRIGQAIARRLKPFGVQRFLYGRQPRPEEAAEFQAEFVSTPELAAQSDFIVVACSLTPATEGLCNKDFFQKMKETAVFINISRGDVVNQDDLYQALASGKIAAAGLDVTSPEPPTNHPLLTLKNCVILPHIGSATHRTRNTMSLLAANNLLAGLRGEPMPSELKL.................................................................................…	330
29	-58.4	3wnv_A mol:protein length:330 glyoxylate reductase	ali model follow..	27	2	....PSQAALLIGDIARAEWEALSSL-VTLKEFPEGGREKFLENCKSRSNISTKHTGPFDRELISALKSVKYICHNGAGYDNIDVDAATEAGIAISSTPIAVNNATADVAIFLMIGALRQAYVPITAIRAGEWHGKTTLGHDPNGKTLGILGMGGIGREVARRARAFGMNIIYHN---KLPPELEDGAKYVSFDELLAQSDVFSLNLALNASTRHIIGEKELAKMKDGVVIVNTARGALIDEKALVRALESGKVASVGLDVYENEPQVEPGLLNNPRAMLLPHIGTMTYETQKEMELLVLNNLRSAIEKGELLTQVP..................................................................................…	325
30	-58.2	4hy3_A mol:protein length:365 phosphoglycerate oxidoreductase	ali model follow..	21	24	LAISAPEPRSLDLIFSDEARAALHSK-YEIVEADPENIAGLGDDILG-RARYIIGQPPLSAETLARMPALRSILNVESNLNNMPYEVLFQRGIHVVTTGQVFAEPVAEIGLGFALALARGIVDADIAFQEGTELEGNASARLIAGSEIGIVGFGDLGKALRRVLSGFRARIRVFDPWLPRSMLEENGVEPASLEDVLTKSDFIFVVAAVTSENKRFLGAEAFSSMRRGAAFILLSRADVVDFDALMAAVSSGHIV-AASDVYPEEPPLDHPVRSLKGFIRSAHRAGALDSAFKKMGDMVLEDMDLMDRGLPPMRCKRAERETVSRM-RSKP....................................................................…	355
31	-56.4	1qp8_A mol:protein length:303 FORMATE DEHYDROGENASE	ali model follow..	19	2	.......ELYVNFELPPEAEEELRKY-----------KIVRGGDLGNVEAALV---SRITAEELAKMPRLKFIQVVTAGLDHLPWESIPP-HVTVAGNAGSNADAVAEFALALLLAPYKRIIQYGEKMKRGDYGRD-VEIPLIQGEKVAVLGLGEIGTRVGKILAALGAQVRGFS----RTPKEGPWRFTNSLEEALREARAAVCALPLNKHTRGLVKYQHLALMAEDAVFVNVGRAEVLDRDGVLRILKERPQFIFASDVWWGRNDKDAEFFSLPNVVATPWVGYGNERVWRQMVMEAVRNLITYATGGRPRNIAKREDYIGS...........................................................................…	303
32	-55.7	3gg9_A mol:protein length:352 d-3-phosphoglycerate dehydrogenase oxidoreduc	ali model follow..	30	4	.......KIAVLDDYQDAVRKLLQDHEVKVFNNTVKGVGQLAARVADVEALVIRERTRVTRQLLDRLPKLKIISQTGDAGGHIDLEACTDKGVVVLEGK-GSPVAPAELTWALVMAAQRRIPQYVASLKHGAWQQSG-IGRVLKGQTLGIFGYGKIGQLVAGYGRAFGMNVLVWGRENSKERARADGFAVASKDALFEQSDVLSVHLRLNDETRSIITVADLTRMKPTALFVNTSRAELVEENGMVTALNRGRPGMAAIDVFETEPLQGHTLLRMENCICTPHIGYVERESYEMYFGIAFQNILDILQGNVD-SVANPTALAPALIRAE......................................................................…	345
33	-53.7	3k5p_A mol:protein length:416 D-3-phosphoglycerate dehydrogenase	ali model follow..	33	17	.......NVLLLEGISQTAVEYFKSSGYT-HLPKALDKADLIKAISSAHIIGIRSRTQLTEEIFAAANRLIAVGCFSVGTNQVELKAARKRGIPVFNAPFSNTRSVAELVIGEIIMLMRRIFPRSVSAHAGGWEKTAIGSREVRGKTLGIVGYGNIGSQVGNLAESLGMTVRYYD--TSDKLQYGNVKPAASLDELLKTSDVVSLHVPSSKSTSKLITEAKLRKMKKGAFLINNARGSDVDLEALAKVLQEGHLAGAAIDVFPVEPASNTPLQGLENVILTPHIGGSTEEAQERIGTEVTRKLVEYSDVGSTVGAVNFPQVQLPPRPTGTRFMHVHENRPGILNSL.....................................................…	360
34	-53.2	2w2k_A mol:protein length:348 D-MANDELATE DEHYDROGENASE	ali model follow..	25	2	....PRPRVLLLGDPARHLDDLWSQQKFEVIPANLTTHDGFKQALGDFEAIIGTESYPWNADLISHLSSLKVFAAAGAGFDWLDLDALNERGVAFANSRGAGDTATSDLALYLILSVFRLASYSERAARTGDPEEIGKSAHNPRGHVLGAVGLGAIQKEIARKAHGLGMKLVYYD--ADAETEKALGAERVSLEELARRSDCVSVSVPYMKLTHHLIDEAFFAAMKPGSRIVNTARGPVISQDALIAALKSGKLLSAGLDVHEFEPQVSKELIEMKHVTLTTHIGGVAIETFHEFERLTMTNIDRFLLQG.........................................................................................…	331
35	-53	5tx7_A mol:protein length:327 D-isomer specific 2-hydroxyacid dehydrogenase family protein	ali model follow..	28	3	.......RIVALDGYTDISWAPIEELG-ELVVHPRTPSDKIIERAAGAH-VVLTNKVPLDMSALQALPGLRFVSVLATGYDKVDVAAAGVLGIPVSNVPGYGTDSVAQHVFALLLELCRRTALHDHRIRAGAWTQSP---EELTGKTMGIVGFGNTGRRVGRIANALGMNVIAYAP--SRFDPDYRPFEHVGLDELFTSADVVSLHCPLTPETEGLVDARRLASMRPGSYLINTARGPLLDERAVAEALDSGRLAGAGLDVLSQEPPADNPLLSAKNCLITPHLAWASRTARRTLMDSTAANIRSFIEGTPV-NVVNAAHLRTK...........................................................................…	326
36	-52.7	2p9c_A mol:protein length:410 D-3-phosphoglycerate dehydrogenase	ali model follow..	33	12	.......KFLLVEGVHQKALESLRAAGYT-FHKGALDDEQLKESIRDAHFIGLRSRTHLTEDVINAAEKLVAIGAFAIGTNQVDLDAAAKRGIPVFNAPFSNTRSVAELVIGELLLLLRGVPEANAKAHRGVWNKLAAGSFEARGKKLGIIGYGHIGTQLGILAESLGMYVYFYD--IENKLPLGNATQVQHLSDLLNMSDVVSLHVPENPSTKNMMGAKEISLMKPGSLLINASRGTVVDIPALADALASKHLAGAAIDVFPTEPATNSPLAEFDNVLLTPHIGGSTQEAQENIGLEVAGKLIKYSDNGSTLSAVNFPEVSLPLHVGRR.....................................................................…	339
37	-52.7	1yba_A mol:protein length:410 D-3-phosphoglycerate dehydrogenase	ali model follow..	33	12	.......KFLLVEGVHQKALESLRAAGYT-FHKGALDDEQLKESIRDAHFIGLRSRTHLTEDVINAAEKLVAIGCFCIGTNQVDLDAAAKRGIPVFNAPFSNTRSVAELVIGELLLLLRGVPEANAKAHRGVWNKLAAGSFEARGKKLGIIGYGHIGTQLGILAESLGMYVYFYD--IENKLPLGNATQVQHLSDLLNMSDVVSLHVPENPSTKNMMGAKEISLMKPGSLLINASRGTVVDIPALCDALASKHLAGAAIDVFPTEPATNSPLCEFDNVLLTPHIGGSTQEAQENIGLEVAGKLIKYSDNGSTLSAVNFPEVSLPLHGGRR.....................................................................…	339
38	-52.6	4dgs_A mol:protein length:340 Dehydrogenase	ali model follow..	25	20	.FRNVKPDLLLVEPMMPFVMDELQRNYSVHRLYQAADRPALEAALPSIRAVATGGGAGLSNEWMEKLPSLGIIAINGVGTDKVDLARARRRNIDVTTTPGVLADDVADLGIALMLAVLRRVGDGDRLVREGRWAAGE-LGHSPKGKRIGVLGLGQIGRALASRAEAFGMSVRYWNRSTLSGVDWIA---HQSPVDLARDSDVLAVCVAASAATQNIVDASLLQALGPEGIVVNVARGNVVDEDALIEALKSGTIAGAGLDVFVNEPAIRSEFHTTPNTVLMPHQGSATVETRMAMGKLVLANLAAHFAGEKAPNTVN..................................................................................…	334
39	-52.1	5j23_A mol:protein length:323 2-hydroxyacid dehydrogenase	ali model follow..	26	3	....SRPRILVPGKINPRVLERLPEM-FETVRIERADAALVTADMRDVSGIAVSG--KLPVPLMDAFPSLEIVANFGVGYDGVDVSRAAARGIVVTNTPDVLTEEVADTAIGLLLNTLRLLPQAEQWLRQGRWVREGLSPLSLRGRTVGLFGLGRIGLAIARRLEAFGVSIAYHTRTPREGLGFTY---HPTLVGMAEAVDTLIVIVPGTASTLKAVNADVLSALGPKGVLINVGRGSTVDEAALVTALQNGTIAGAGLDVFENEPNVPEALLSFPNVSLLPHVASASVVTRNAMSDLVVDNLKAWFSTGEALTPV...................................................................................…	311
40	-51.6	5uog_A mol:protein length:344 NADPH-dependent glyoxylate/hydroxypyruvate reductase	ali model follow..	26	14	FQSMSRPRILVPGKINPRVLERLPEM-FETVRIERADAALVTADMRDVSGIAVSG--KLPVPLMDAFPSLEIVANFGVGYDGVDVSRAAARGIVVTNTPDVLTEEVADTAIGLLLNTLRLLPQAEQWLRQGRWVREGLSPLSLRGRTVGLFGLGRIGLAIARRLEAFGVSIAYHTRTPREGLGFTY---HPTLVGMAEAVDTLIVIVPGTASTLKAVNADVLSALGPKGVLINVGRGSTVDEAALVTALQNGTIAGAGLDVFENEPNVPEALLSFPNVSLLPHVASASVVTRNAMSDLVVDNLKAWFSTGEALTPV...................................................................................…	326
41	-50.9	3kb6_A mol:protein length:334 D-lactate dehydrogenase	ali model follow..	30	20	........................LKDLSLKIYTTDVSKVPENELKKAELISVFVYDKLTEELLSKMPRLKLIHTRSVGFDHIDLDYCKKKGILVTHIPAYSPESVAEHTFAMILTLVKRLKRIEDRVKKLNFSDSEILARELNRLTLGVIGTGRIGSRVAMYGLAFGMKVLCYDVVKRED-LKEKGCVYTSLDELLKESDVISLHVPYTKETHHMINEERISLMKDGVYLINTARGKVVDTDALYRAYQRGKFSGLGLDVFEDEEIKILELACKDNVIITPHIAYYTDKSLERIREETVKVVKAFVKGDLEQIKGN..................................................................................…	328
42	-49.8	1j49_A mol:protein length:333 D-LACTATE DEHYDROGENASE	ali model follow..	25	23	.......................AHKDVEVEYTDKLLTPETVALAKGADGVVVYQQLDYIAETLQALADITKMSLRNVGVDNIDMAKAKELGFQITNVPVYSPNAIAEHAAIQAARILRQDKAMDEKVARHDLRWAPTIGREVRDQVVGVVGTGHIGQVFMQIMEGFGAKVITYDIFRNPE-LEKKGYYVDSLDDLYKQADVISLHVPDVPANVHMINDESIAKMKQDVVIVNVSRGPLVDTDAVIRGLDSGKIFGYAMDVYEGEVG--ADLIARPNVLVTPHTAFYTTHAVRNMVVKAFDNNLELVEGKEAETPVKV.................................................................................…	332
43	-49.6	1dxy_A mol:protein length:333 D-2-HYDROXYISOCAPROATE DEHYDROGENASE	ali model follow..	25	21	.......................KDTGNTLEYHTEFLDENTVEWAKGFDGINSLQTTPYAAGVFEKMHAIKFLTIRNVGTDNIDMTAMKQYGIRLSNVPAYSPAAIAEFALTDTLYLLRNMGKVQAQLQAGDYEAGTFIGKELGQQTVGVMGTGHIGQVAIKLFKGFGAKVIAYDPY--PMKGDHPDFDYVSLEDLFKQSDVIDLHVPGIEQNTHIINEAAFNLMKPGAIVINTARPNLIDTQAMLSNLKSGKLAGVGIDTYEYETE--DELLGMPNVVLSPHIAYYTETAVHNMVYFSLQHLVDFLTKGETSTEVTGPA...............................................................................…	332
44	-49.5	2dld_A mol:protein length:337 D-LACTATE DEHYDROGENASE	ali model follow..	26	23	.......................AHKDIDVDYTDKLLTPETAKLAKGADGVVVYQQLDYTADTLQALADVTKMSLRNVGVDNIDMDKAKELGFQITNVPVYSPNAIAEHAAIQAARVLRQDKRMDEKMAKRDLRWAPTIGREVRDQVVGVVGTGHIGQVFMRIMEGFGAKVIAYDIFKNPE-LEKKGYYVDSLDDLYKQADVISLHVPDVPANVHMINDKSIAEMKDGVVIVNCSRGRLVDTDAVIRGLDSGKIFGFVMDTYEDEVG--ADLIDRPNVLVTPHTAFYTTHAVRNMVVKAFNNNLKLINGEKPDSPVALN................................................................................…	333
45	-49.3	3ba1_A mol:protein length:333 Hydroxyphenylpyruvate reductase	ali model follow..	28	13	.SHMEAIGVLMMCPMSTYLEQELDKRKLFRYWTQPAQRDFLALQAESIRAVVGNSNAGADAELIDALPKLEIVSSFSVGLDKVDLIKCEEKGVRVTNTPDVLTDDVADLAIGLILAVLRRICECDKYVRRGAWKFGDFLTTKFSGKRVGIIGLGRIGLAVAERAEAFDCPISYFSRSKKPNTNYTY---YGSVVELASNSDILVVACPLTPETTHIINREVIDALGPKGVLINIGRGPHVDEPELVSALVEGRLGGAGLDVFEREPEVPEKLFGLENVVLLPHVGSGTVETRKVMADLVVGNLEAHFSGKPLLTPV...................................................................................…	326
46	-48.9	4xkj_A mol:protein length:335 D-lactate dehydrogenase	ali model follow..	28	21	.......................KKTGVQVDINRLELDAETAQLTKGYDGIVIQQRSHISNPAV-QKNGLRQLTSRTAGYDMIDLEQASERGLVVTNVPAYSPNSVAELALTQTMRLIRNLPLFDARGAEQDFRWAGLMAREIRSLTVGIIGAGRIGGTVARLFKALGATVIANDIVERVELKD--IVTYVSKEELLQAADVVTLHVPLMDSTTQLIDADALALMKNDAVLINASRGPVVDTDALIAALQNKQIAGAALDTLNGEEH--KVLRTLPNVLITPHIGFYTNKAVQNMVEISLNDVLAILKTGTSEHQLNKVAVE.............................................................................…	334
47	-48.6	4prk_A mol:protein length:336 4-phosphoerythronate dehydrogenase	ali model follow..	26	21	.......................KKFGCELKLIDESLSAENVDQVADCDGVLLKPLGNLDDEIV-ADYGIKSIGLRIVGTNTIDFDLAKKYHLTVTNVPVYSPRAIAEMAVTQAMYLNRKIGEFKANMDKGDFT-DSLISNEIYNKTIGLIGVGHIGSAVAQIFSAMGAKVLAYDVIYNPE---EPYLTYADFDTVLKEADIISLHTPLLKSTENMIGKKQFAEMKNDAILINAARGELVDTAALIEALEKHEIAAAGLDTLAHEPADYKKLAAMPNVIVTPHSAYFTKTSVRNMIEISLRDTIALANGERAHFVVS..................................................................................…	329
48	-48.5	4lsw_A mol:protein length:318 D-2-hydroxyacid dehydrogensase protein	ali model follow..	25	2	....TKPEILQLGPYPAWDQEPLDAATVHRLFEADDRAAMLANVGDRIRAIATRGELGASRALIEACPNLELISVYGVGYDAVDLAACRERGIQVTNTPDVLTGDVADLGVAMMLAQSRGIIGAETWARSGKWAAEG-LKRRVFGRRAGVLGLGRIGFEVARRLAGFDMQISYSDIAPKSYAPD-----VEDAVTLARDVDFLFVTLAASAATRHIVGRDVIEALGPEGMLINISRASNIDEEALIAALADGRLGSAALDVFEGEPNFDPRFRDLPNVLLQPHHASGTIETRKAMGQLLRDNLTAHFAGSPLLTPV...................................................................................…	314
49	-47.9	2yq4_A mol:protein length:343 D-ISOMER SPECIFIC 2-HYDROXYACID DEHYDROGENASE	ali model follow..	25	22	.......................KKNDVEIKTTDQALTSATVDLAEGCSSVSLKPLGPVDEEVV-SEYGVKCIGLRIVGFNTINFDWTKKYNLLVTNVPVYSPRAIAEMTVTQAMYLLRKIGEFRYRMDHDH--PSNLISNEIYNLTVGLIGVGHIGSAVAEIFSAMGAKVIAYDVAYNPEFEP--FLTYTDFDTVLKEADIVSLHTPLFPSTENMIGEKQLKEMKKSAYLINCARGELVDTGALIKALQDGEIAGAGLDTLAGEPEDYKTLAKMPNVVITPHSAFYTETSIRNMVQICLTDQLTIAKGGRPRSIVNLT................................................................................…	334
50	-47.5	1xdw_A mol:protein length:331 NAD+-dependent (R)-2-Hydroxyglutarate Dehydro	ali model follow..	24	30	...............................VPDYLNTKETAEMAAGFDAVILRGNCFANKQNLDIYKKVKYILTRTAGTDHIDKEYAKELGFPMAFVPRYSPNAIAELAVTQAMMLLRHTAYTTSRTAKKNFKDAFMFSKEVRNCTVGVVGLGRIGRVAAQIFHGMGATVIGEDVFEIKGIED---CTQVSLDEVLEKSDIITIHAPYIKENGAVVTRDFLKKMKDGAILVNCARGQLVDTEAVIEAVESGKLGGYGCDVLDGEPLFEKLVDLYPRVLITPHLGSYTDEAVKNMVEVSYQNLKDLAETGDCPNKIK..................................................................................…	331
51	-47.2	5mh5_A mol:protein length:308 D-2-hydroxyacid dehydrogenase	ali model follow..	26	20	..............................RFIEALSDLGVPVEFAGEDEQFGPGDAVASFGHRDAFLDADWVHCIRAGYDEFPVGVYEEAGTYLTNSTGIHGTTVGETVAGYMLTFARRLHAYRDAQHDHAWDLPRYEEPTLAGERVCVVGLGTLGRGVVDRAAALGMEVVGVRRSGDPVDNVSTVYTPDRLHEAIADARFVVLATPLTDETEGMVAAPEFETMREDASLVNVARGPVVVESDLVAALDSGDIAGAALDVFSEEPPEDSPLWDFEDVLITPHVSAATSKYHEDVAALIRENIEKIATGDELTNRV...................................................................................…	307
52	-46.5	4cuj_A mol:protein length:338 D-LACTATE DEHYDROGENASE	ali model follow..	26	21	.......................EAFGFELEFFDFLLTEKTAKTANGCEAVCIFVNDDGSRPVLEKKHGVKYIALRCAGFNNVDLDAAKELGLQVVRVPAYSPEAVAEHAIGMMMTLNRRIHRAYQRTRDANFSLEGLTGFTMHGKTAGVIGTGKIGVAALRILKGFGMRLLAFDPYPSTA-ALDLGVEYVDLQTLFAESDVISLHCPLTPENYHLLNHAAFDQMKNGVMIINTSRGALIDSQAAIEALKNQKIGSLGMDVYENERD--RRLSACHNVLFTGHQAFLTAEALISISETTLQNLSQLEKGEACPNALFKSS...............................................................................…	332
53	-45.9	3wwy_A mol:protein length:358 D-lactate dehydrogenase	ali model follow..	26	41	.......................ADYNFEMTFLKVRLTEETANLTKGYDVVCGFANDNINKETIDAENGIKLLAMRCAGFNNVSLKDV-NERFKVVRVPAYSPHAIAEYTVGLILAVNRKINKAYVRTREGNFSINGLMGIDLYEKTAGIIGTGKIGQILIKILRGFDMKVIAYDLFPNQKVADELGFEYVSLDELYANSDIISLNCPLTKDTKYMINRRSMLKMKDGVILVNTGRGMLIDSADLVEALKDKKIGAVALDVYEEEEN--GRLLSFYNVLITSHQAYFTKEAVGAITVTTLNNIKDFVEGRPLVNEVPQN................................................................................…	351
54	-45.9	3wx0_A mol:protein length:345 D-isomer specific 2-hydroxyacid dehydrogenase	ali model follow..	26	31	.......................ESFGFELEFFDFLLTEKTAKTANGCEAVCIFVNDDGSRPVLEKKHGVKYIALRCAGFNNVDLDAAKELGLKVVRVPAYDPEAVAEHAIGMMMTLNRRIHRAYQRTRDANFSLEGLTGFTMYGKTAGVIGTGKIGVAMLRILKGFGMRLLAFDPYPSAA-ALELGVEYVDLPTLFSESDVISLHCPLTPENYHLLNEAAFDQMKNGVMIVNTSRGALIDSQAAIEALKNQKIGSLGMDVYENERD--RRLSACHNVLFTGHQAFLTAEALTSISQTTLQNLSNLEKGETCPNEL...................................................................................…	338
55	-45.2	3wwz_A mol:protein length:345 D-lactate dehydrogenase (Fermentative)	ali model follow..	27	31	.......................HRHGFELHFQQAHLQADTAVLAQGFEVVCAFVNDDLSRPVLEAAGGTRLVALRSAGYNHVDLAAAEALGLPVVHVPAYSPHAVAEHAVGLILTLNRRLHRAYNRTREGDFSLHGLTGFDLHGKRVGVIGTGQIGETFARIMAGFGCELLAYDPYPNPR-IQALGGRYLALDALLAESDIVSLHCPLTADTRHLIDAQRLATMKPGAMLINTGRGALVNAAALIEALKSGQLGYLGLDVYEEEAD--ARLLSFPNVVVTAHQAFLTREALAAIADTTLDNIAAWQDGTPRNRV....................................................................................…	337
56	-44.9	3evt_A mol:protein length:324 Phosphoglycerate dehydrogenase	ali model follow..	23	1	.....MSLVLMAQATKPEQLQQLQTPDWTFKDAAAVTAADYDQI-----EVMYGNHPLLKTILARPTNQLKFVQVISAGVDYLPLKALQAAGVVVANTSGIHADAISESVLAAMLSVVRGYHAAWLNQRGARQWALPMTTSTLTGQQLLIYGTGQIGQSLAAKASALGMHVIGVNTTGHPADHFHETVAFTATADALATANFIVNALPLTPTTHHLFSTELFQQTKQQPMLINIGRGPAVDTTALMTALDHHQLSMAALDVTEPEPPTDHPLWQRDDVLITPHISGQIAHFRATVFPIFAANFAQFVKGTLVRNQVDL.................................................................................…	312
57	-44.8	4zgs_A mol:protein length:386 Putative D-lactate dehydrogenase	ali model follow..	27	55	.......................QKVFTDTYFVEPPLDKDTAQLARGYDVAVLFVNDRADASVIKAKAGVKLIALRCAGFDRVDLHACAEHGVRVVRVPTYSPESVAEHAVALIFALNRHLTDAYIRVRMGNYSLSGLVGVEMRHKVVGVVGTGAIGQQAARILKGIGCKVFAYDIKPNPA-VEAMGIPYVSLDELLAMSDIVTLHCPLLPSTRQLINKESIQKMKKGVMLINVSRGGLIDSAALFDALESGQIGALGLDVYENEGG--RTLLSYPQVLVTPHTAFLTEEALNNICTTTIQNIADYVLDRPLGNEVKAQPAPAGKTLE.......................................................................…	380
58	-44.2	3hg7_A mol:protein length:324 D-isomer specific 2-hydroxyacid dehydrogenase	ali model follow..	25	4	....SQRTLLLLSQDNAHYERLLKAAHLHLRILRADNQSDAEKLIGEAHILM--AEPARAKPLLAKANKLSWFQSTYAGVDVL-LDARCRRDYQLTNVRGIFGPLMSEYVFGHLLSLMRQLPLYREQQKQRLWQSHPYQ--GLKGRTLLILGTGSIGQHIAHTGKHFGMKVLGVSRSGRERAGFDQVYQLPALNKMLAQADVIVSVLPATRETHHLFTASRFEHCKPGAILFNVGRGNAINEGDLLTALRTGKLGMAVLDVFEQEPPADSPLWGQPNLIITPHNSAYS---PDDVAQIFVRNYIRFIDGQPLDGKID..................................................................................…	311
59	-42.2	5dt9_A mol:protein length:387 Erythronate-4-phosphate dehydrogenase	ali model follow..	29	1	MPQIPTMKILIDENMPYAQALFSQLGEVILKPGRTLTADD----LIDVDALMIRSVTKVNDALLAKANRLKFVGTATAGMDHVDQALLRERGIFFTAAPGCNKVGVAEYVFSVLMVLAQQ------------------QGFSVFDKTVGIIGAGQVGSYLAKCLSGIGMKVLLNDP---PKQAQGDEREFTELETLLKQADVITLHTPITRGTHHLIDAAILEQLRSDQILINAARGPVVDNAALKARLQQGDGFTAVLDVFEFEPQVDMELLPL--AFATPHIAGYGLEGKARGTTMIFNSYCEFL............................................................................................…	285
60	-41.7	2o4c_A mol:protein length:380 Erythronate-4-phosphate dehydrogenase	ali model follow..	25	2	.......RILADENIPVVDAFFADQGSIRRLPGRAIDRAA----LAEVDVLLVRSVTEVSRAALA-GSPVRFVGTCTIGTDHLDLDYFAEAGIAWSSAPGCNARGVVDYVLGCLLAMAEV------------------RGADLAERTYGVVGAGQVGGRLVEVLRGLGWKVLVCDP---PRQAREPDGEFVSLERLLAEADVISLHTPLNRDTRHLLDEPRLAALRPGTWLVNASRGAVVDNQALRRLLEGGADLEVALDVWEGEPQADPELAAR--LIATPHIAGYSLEGKLRGTAQIYQAYCAWRGIAERVSLQDVLPETWLAGLQLNPGCDPAWALATLCRAVYD...................................................…	319
61	-39.1	3oet_A mol:protein length:381 Erythronate-4-phosphate dehydrogenase	ali model follow..	27	1	...SNAMKILVDENMPYARELFSRLGEVKAVPGRPIPVEE----LNHADALMVRSVTKVNESLLS-GTPINFVGTATAGTDHVDEAWLKQAGIGFSAAPGCNAIAVVEYVFSALLMLAER------------------DGFSLRDRTIGIVGVGNVGSRLQTRLEALGIRTLLCDPPRAARGDEG---DFRTLDELVQEADVLTFHTPLYKDTLHLADETLIRRLKPGAILINACRGPVVDNAALLARLNAGQPLSVVLDVWEGEPDLNVALLEA--DIGTSHIAGYTLEGKARGTTQVFEAYSAFI............................................................................................…	281
62	-37.4	4xa8_A mol:protein length:320 D-isomer specific 2-hydroxyacid dehydrogenase	ali model follow..	22	2	MNEQASGALVFYSAVDIGQDWKSALQAAHPGLDVRIARAGDGHVEGDPEEVRYALVWKPPHGFFARFPNLKLVINLGAGVDALVARDDLPDVPVTRLSDPNMSQMMASFVLFCVLRHARDIPTFERAQREGRWHYVHPRTAA--EIRVGVLGLGDLGAAAALELARHGFDVRGWSRTPKALEGVSCFHGLEALPGFLAGSEIVVVMLPLTPETRGLMNAERLAHLPRGAKFINVARGPVVDEAALIAALRSGHIAEATLDVFEVEPPVGSPLWAMDNVLVTPHLASIAI--PRTAAPQIVENIRRIEAGEPVLNQVD..................................................................................…	315
63	-37.2	4zqb_A mol:protein length:316 NADP-dependent dehydrogenase	ali model follow..	24	55	.........................................................NPDPADLAELPNLVWIHSLWAGVERLVAELGHLARPIVRLVDPELARTMAEAALAWTYYLFRDMPAYAAQQRARVWKGLPYKRPE--RTTVGVLGLGELGAAAALRLRDAGFDVHGWSRSPKEIAGVTCHAGEETLERMLGQVEILVCLLPLTGETRGLLDARRLACLPEGAQIVNFARGPILDSAALIEALDSGRIGHAVLDVFEVEPPEASPFWGHPKVTVLPHISAATD--PETASAIVGAHVADYRATGRIPPSVD..................................................................................…	311
64	-36.3	5vg6_A mol:protein length:341 D-isomer specific 2-hydroxyacid dehydrogenase NAD-binding	ali model follow..	22	17	MNEQASGALVFYSAVDIGQDWKSALQAAHPGLDVRIARAGDGHVEGDPEEVRYALVWKPPHGFFARFPNLKLVINLGAGVDALVARDDLPDVPVTRLSDPNMSQMMASFVLFCVLRHARDIPTFERAQREGRWHYVHPRTAA--EIRVGVLGLGDLGAAAALELARHGFDVRGWSRTPKALEGVSCFHGLEALPGFLAGSEIVVVMLPLTPETRGLMNAERLAHLPRGAKFINVARGPVVDEAALIAALRSGHIAEATLDVFEVEPPVGSPLWAMDNVLVTPHLASIAI--PRTAAPQIVENIRRIEAGEPVLNQVD..................................................................................…	330
65	-36	4n18_A mol:protein length:332 D-isomer specific 2-hydroxyacid dehydrogenase	ali model follow..	23	65	.........................................................FPDPQLLSRSPGLKLIQAASAGVDHLPPALFASEIPLCRVIDEDFRHGMFEYALWSVLWFQRHFDRALAHQRTQTWKLYPQRAAA--DFHIGIMGLGEIGGYIADQLARLGYRVSGWSRSEKQLAGVTCYRGEEALDHFLGSLDGLINLLPLTAQTRGILAAPLFNRLPAGAVLINCGRGEHMVNDDVLAALESGQLAGAVLDVFPQEPPADDPLWRHPQVVITPHMASAAP--AEVIARQLLENIQRQRRGLPLKNLVN..................................................................................…	321
66	-35.5	3kbo_A mol:protein length:315 Glyoxylate/hydroxypyruvate reductase A	ali model follow..	26	54	...............................................................MLAGRRLKAVFVLGAGVDAILSKLNAHPEMLDASIPTGMGLQMQEYAVSQVLHWFRRFDDYQALKNQALWKPLPEYTRE--EFSVGIMGAGVLGAKVAESLQAWGFPLRCWSRSRKSWPGVESYVGREELRAFLNQTRVLINLLPNTAQTVGIINSELLDQLPDGAYVLNLARGVHVQEADLLAALDSGKLKGAMLDVFSQEPPQESPLWRHPRVAMTPHIAAVTR--PAEAIDYISRTITQLEKGEPVTGQVD..................................................................................…	310
67	-35	5bqf_A mol:protein length:322 NADP-dependent 2-hydroxyacid dehydrogenase	ali model follow..	24	57	.........................................................KPDADLFRRAPNLKVIFSGGAGVDHIIGMAGLPDIPIVRFVDRSLTTRMSEWVVMQCLMHLRGQYGHDSHQRRREWAKLI---PEAAEVTVGVMGLGILGQDAVAKLKVMGFNVIGW----SRTRKTIEGVETFELDRFLAKTDILVGLLPLTPETTGFYDSELFKKLRRDGAFINAGRGKSQIETDIVSAVREGTLGGASLDVFEVEPATDSPLWELENVFITPHDAAVSE--ENALFRHVEMQIARFERGEPLQFVID..................................................................................…	317
68	-34.2	4weq_A mol:protein length:341 NAD-dependent dehydrogenase	ali model follow..	27	51	......................................ADPAHQERDLSGIDYAVVWKSAPDLFSRAPDLKVVFSGGAGVDHVLTLPGLPDVPLVRFVDRTLTTRMSEWVMMQCLLHLRQHRAYEALAKKHEWRDLS---PEAADVTVGIMGMGVLGQDAARKLAAMGFKVIGW----SRSKRVIEGVETYGLDAFLGRTDFLVGLLPLTPDTRGIFNAALFAKLSRNGPFINAGRGGSQVEADILECLDSGVLGGASLDVFEREPSPESRFWDMPNVYVTPHVAASSD--VRALFVHVEHQIARFESGLPLEHVVD..................................................................................…	330
