# Supplementary material for: Rum för lärande, med eller utan väggar : En studie om utomhusdidaktikens relation till inomhusdidaktiken samt biologiämnet
Source: Royal Society of Chemistry journal article supplement (doi:10.1039/c9fo00394k), 2009-01-01
Supplement: c9fo00394k2.pdf [file c9fo00394k2.pdf]

## SUPPORTING INFORMATION

### **Ixocarpalactone A from dietary tomatillo inhibits pancreatic cancer growth by targeting PHGDH**

Mengzhu Zheng,<sup>a#</sup> Jing Guo,<sup>a#</sup> Jiamin Xu,<sup>b#</sup> Kaiyin Yang,<sup>a</sup> Ruotian Tan,<sup>a</sup> Xiaoxia Gu,<sup>a</sup> Hua Li,<sup>\*a</sup> Li-Xia Chen<sup>\*b</sup>

<sup>a</sup> Hubei Key Laboratory of Natural Medicinal Chemistry and Resource Evaluation,  
School of Pharmacy, Tongji Medical College, Huazhong University of Science and  
Technology, Wuhan, 430030, China.

<sup>b</sup> Wuya College of Innovation, Key Laboratory of Structure-Based Drug Design &  
Discovery, Ministry of Education, Shenyang Pharmaceutical University, Shenyang  
110016, China.

# These authors contribute equally to this work.

#### **Corresponding Authors**

\* Tel: +86-24-23986463. E-mail: [syzyclx@163.com](mailto:syzyclx@163.com). (Li-Xia Chen)

\* Tel: +86-24-23986463. E-mail: [li\\_hua@hust.edu.cn](mailto:li_hua@hust.edu.cn). (Li-Xia Chen)

**Table S1.  $^1\text{H}$  and  $^{13}\text{C}$  NMR Spectroscopic Data for IoxA (in  $\text{CDCl}_3$ ;  $^1\text{H}$  NMR, 600 MHz;  $^{13}\text{C}$  NMR, 150 MHz).**

| No. | $\delta_{\text{C}}$ | $\delta_{\text{H}}$ ( $J$ in Hz) |
|-----|---------------------|----------------------------------|
| 1   | 202.2               |                                  |
| 2   | 132.5               | 6.19 d (9.9)                     |
| 3   | 142.0               | 6.92 dd (9.9,5.8)                |
| 4   | 70.1                | 3.75 d (5.8)                     |
| 5   | 64.1                |                                  |
| 6   | 62.6                | 3.22 br s                        |
| 7   | 31.2                | 2.06-2.13 m 1.31                 |
| 8   | 29.0                |                                  |
| 9   | 44.2                |                                  |
| 10  | 47.8                |                                  |
| 11  | 21.9                | 1.81-1.84 m                      |
| 12  | 40.1                | 2.06-2.13 m                      |
| 13  | 43.3                |                                  |
| 14  | 54.5                |                                  |
| 15  | 37.3                | 2.24-2.29 m                      |
| 16  | 73.7                | 4.52 m                           |
| 17  | 58.2                | 1.38 d (7.2)                     |
| 18  | 15.0                | 1.12 s                           |
| 19  | 17.6                | 1.40 s                           |
| 20  | 79.3                |                                  |
| 21  | 23.2                | 1.36 s                           |
| 22  | 74.0                | 4.46 s                           |
| 23  | 78.6                | 3.93 br s                        |
| 24  | 41.8                | 2.24-2.29 m                      |
| 25  | 40.2                | 2.64-2.70 m                      |
| 26  | 180.3               |                                  |
| 27  | 14.3                | 1.16 d (7.1)                     |
| 28  | 13.2                | 1.22 d (6.9)                     |



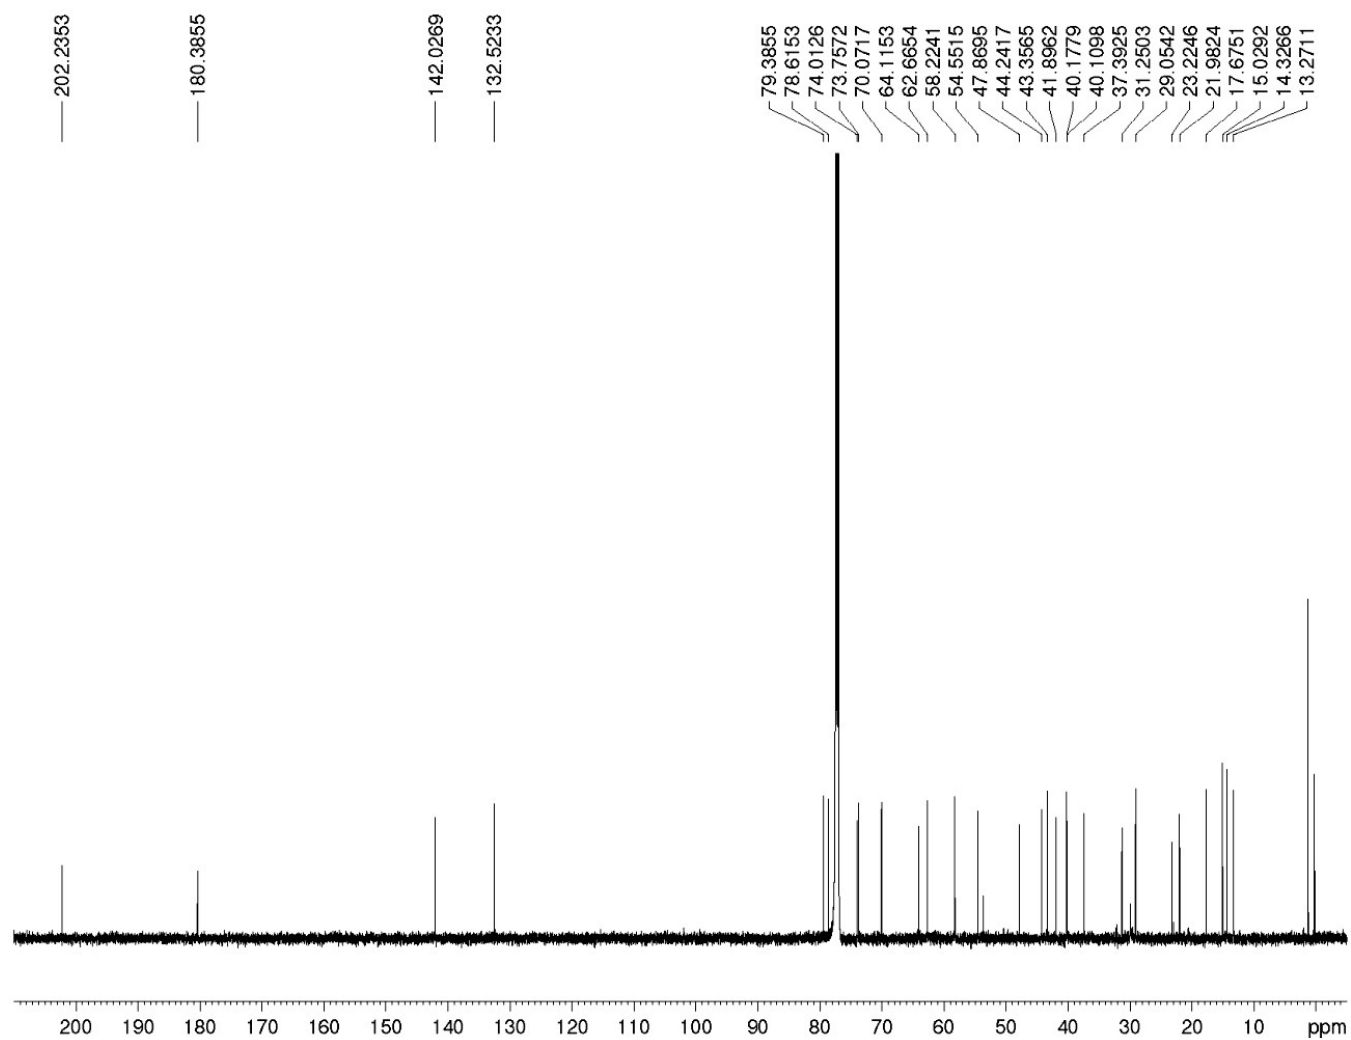

**Figure S2.**  $^{13}\text{C}$ -NMR spectrum of **IoxA** (150 MHz,  $\text{CDCl}_3$ )

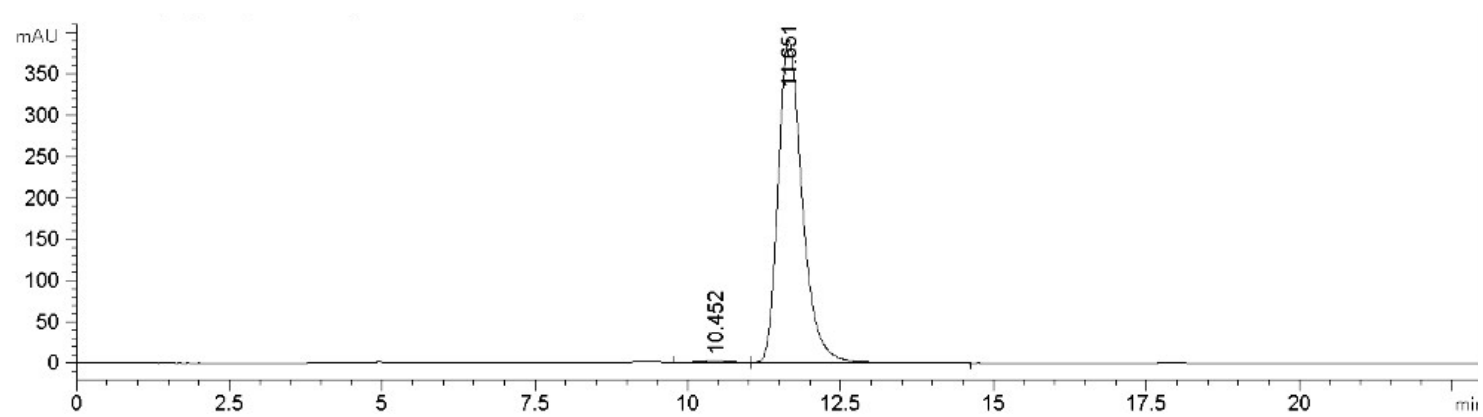

**Figure S3.** HPLC analysis of **IoxA** (230 nm, MeOH:H<sub>2</sub>O=60:40)

FFAS03:  FFAS-3D:  PDB-BLAST:  BLAST:  PSI-BLAST:

**Results of FFAS03 search in PDB0516**  
 Master-slave alignment(slide right to see more) does not show gaps in the query sequence, use [ali](#) links to display alignment between query and templates.

| #  | Score    | Template                                                                                   | Links and tools                                                    | %id | First | MAFANLRKVLISDSLDPCCKILQDGGGLQVVEKQNLKEELIAELQDCEG   |
|----|----------|--------------------------------------------------------------------------------------------|--------------------------------------------------------------------|-----|-------|-----------------------------------------------------|
| 1  | -117.000 | <a href="#">lygy</a> A mol:protein length:529 D-3-phosphoglycerate dehydrogenase           | <a href="#">ali</a> <a href="#">model</a> <a href="#">follow..</a> | 32  | 1     | ..MVSLPVVLIADKLAPSTVAALGD-QVEVVRWVDGPDRLKLLAAVPEADA |
| 2  | -99.100  | <a href="#">2q76</a> A mol:protein length:335 D-3-phosphoglycerate dehydrogenase           | <a href="#">ali</a> <a href="#">model</a> <a href="#">follow..</a> | 99  | 16    | .SMANLRKVLISDSLDPCCKILQDGGGLQVVEKQNLKEELIAELQDCEG   |
| 3  | -95.800  | <a href="#">1wwk</a> A mol:protein length:307 phosphoglycerate dehydrogenase               | <a href="#">ali</a> <a href="#">model</a> <a href="#">follow..</a> | 42  | 2     | ....KRMKVLVAAPLHEKAIQVLKAGLEVIYEYFDEDRLVKDV         |
| 4  | -94.000  | <a href="#">2ek1</a> A mol:protein length:313 D-3-phosphoglycerate dehydrogenase           | <a href="#">ali</a> <a href="#">model</a> <a href="#">follow..</a> | 35  | 4     | ....YTVKALITDPIDEILIKTLREKGIQVDYMPFISKEELLNIGNYDI   |
| 5  | -81.000  | <a href="#">1mx3</a> A mol:protein length:347 C-terminal binding protein 1                 | <a href="#">ali</a> <a href="#">model</a> <a href="#">follow..</a> | 30  | 10    | PRGSHMPLVALLDGRDCTEMPILKDVATVAFCDQASTQEIHEKVLNEAVG  |
| 6  | -81.000  | <a href="#">6cdf</a> A mol:protein length:373 C-terminal-binding protein 1                 | <a href="#">ali</a> <a href="#">model</a> <a href="#">follow..</a> | 30  | 10    | PRGSHMPLVALLDGRDCTEMPILKDVATVAFCDQASTQEIHEKVLNEAVG  |
| 7  | -79.600  | <a href="#">2ome</a> A mol:protein length:336 C-terminal-binding protein 2                 | <a href="#">ali</a> <a href="#">model</a> <a href="#">follow..</a> | 30  | 1     | .SMHPRPLVALLDGRDCTVEMPILKDLATVAFCDQASTQEIHEKVLNEAVG |
| 8  | -79.200  | <a href="#">1hku</a> A mol:protein length:358 C-TERMINAL BINDING PROTEIN 3                 | <a href="#">ali</a> <a href="#">model</a> <a href="#">follow..</a> | 31  | 14    | .PMHPRPLVALLDGRDCTVEMPILKDVATVAFCDQASTQEIHEKVLNEAVG |
| 9  | -77.800  | <a href="#">4lcj</a> A mol:protein length:349 C-terminal-binding protein 2                 | <a href="#">ali</a> <a href="#">model</a> <a href="#">follow..</a> | 30  | 16    | .GSHPRPLVALLDGRDCTVEMPILKDLATVAFCDQASTQEIHEKVLNEAVG |
| 10 | -77.600  | <a href="#">4njm</a> A mol:protein length:309 D-3-phosphoglycerate dehydrogenase, putative | <a href="#">ali</a> <a href="#">model</a> <a href="#">follow..</a> | 31  | 6     | .....VVITEKPFNAENAVKGIREAGHEVMIEKYKKEDVIERIKDADG    |
| 11 | -75.200  | <a href="#">3naq</a> A mol:protein length:357 Formate dehydrogenase                        | <a href="#">ali</a> <a href="#">model</a> <a href="#">follow..</a> | 29  | 26    | .....PNFLGCVENALGIRDWLESQGHQVTDKREGPDCELEKHIPDLHV   |
| 12 | -74.100  | <a href="#">3wr5</a> A mol:protein length:406 Formate dehydrogenase                        | <a href="#">ali</a> <a href="#">model</a> <a href="#">follow..</a> | 25  | 47    | .AIDFTPGQLGSGVSGELGLRKYLEANFVVTSDKDGPDVFEKELVDADV   |
| 13 | -73.500  | <a href="#">2d0i</a> A mol:protein length:333 dehydrogenase                                | <a href="#">ali</a> <a href="#">model</a> <a href="#">follow..</a> | 28  | 2     | .....RPKVGVLKMKREALEELKRY-ADVEIILYPSGEELKGVIGRFDG   |
| 14 | -71.700  | <a href="#">2fss</a> A mol:protein length:365 formate dehydrogenase                        | <a href="#">ali</a> <a href="#">model</a> <a href="#">follow..</a> | 25  | 21    | LYGCTENKLGIANWLKDGHELI-----TTSDEEGNSVLDQHIPDADI     |
| 15 | -71.600  | <a href="#">5dn9</a> A mol:protein length:364 FDH                                          | <a href="#">ali</a> <a href="#">model</a> <a href="#">follow..</a> | 25  | 20    | LYGCTENKLGIANWLKDGHELI-----TTSDEEGNSVLDQHIPDADI     |

FFAS is supported by the NIH grant R01-GM087218-01  
 122351 jobs submitted since Jan 1, 2011  
 Comments and questions to: [webmaster](#)

**Figure S4.** Human PHGDH sequence searched in the FFAS server, finding the most resembling structure.





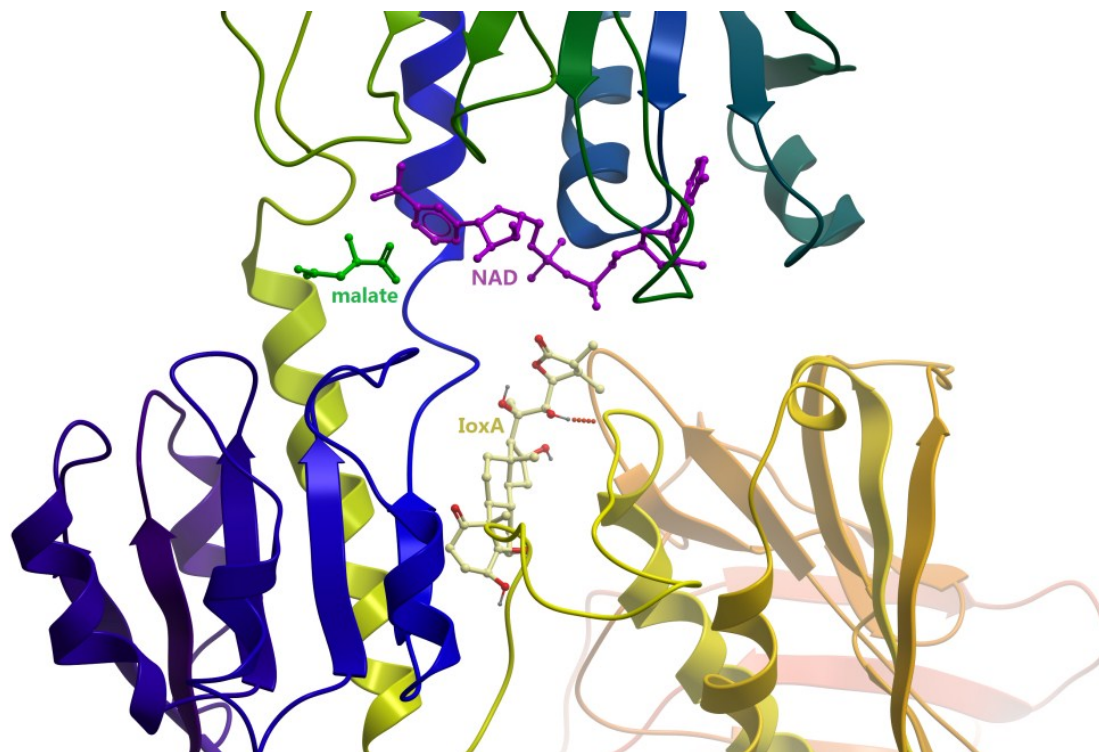

**Figure S6.** Binding mode of IoxA with human PHGDH. IoxA (yellow) was well fitted an allosteric site of the enzyme, where it was in the back side of the active site, where NAD (purple) and malate (green) were bound.
